# Supplementary material for: Phosphorylcholine-Functionalized PEDOT-Gated Organic Electrochemical Transistor Devices for Ultra-Specific and Sensitive C-Reactive Protein Detection
Source: MDPI journal article supplement (doi:10.3390/polym15183739), 2023-09-12
Supplement: s1 [file s1]

# Supplementary Material: Phosphorylcholine-Functionalized PEDOT-Gated Organic Electrochemical Transistor Devices for Ultra-Specific and Sensitive C-Reactive Protein Detection

Sihao Qian, Shouyan Zhang, Danni Chen, Jun Wang, Wei Wu, Shuhua Zhang, Zhi Geng, Yong He, and Bo Zhu

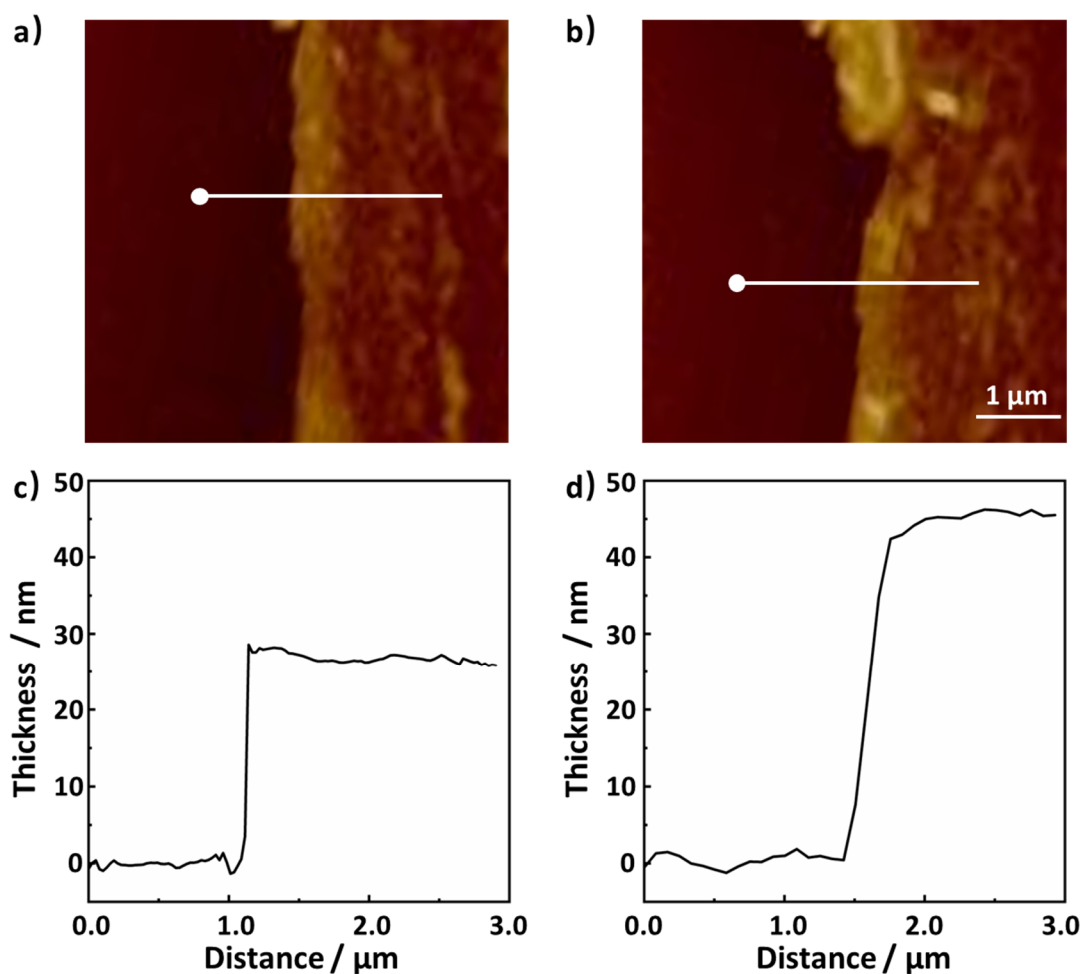

**Figure S1.** Surface topographies of (a) the PEDOT-OH film and (b) the PEDOT-PC film deposited on the PEDOT-OH film (scan range: 5 μm × 5 μm) and height profiles of the scratches of (c) the PEDOT-OH film and (d) the PEDOT-PC film deposited on the PEDOT-OH film.

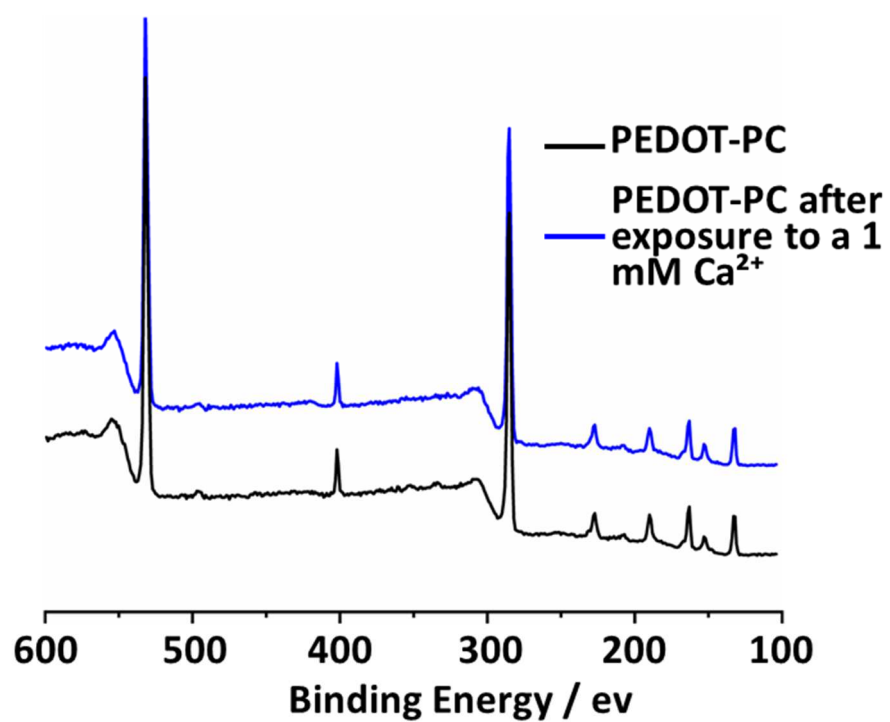

**Figure S2.** XPS spectra of the PEDOT-PC and PEDOT-PC after exposure to the 1 mM Ca<sup>2+</sup> solution.
